# Supplementary material for: Unhealthy Lifestyle, Genetics and Risk of Cardiovascular Disease and Mortality in 76,958 Individuals from the UK Biobank Cohort Study
Source: MDPI journal article supplement (doi:10.3390/nu13124283), 2021-11-27
Supplement: s1 [file s1]

**TITLE:** Unhealthy lifestyle, genetic risk and risk of cardiovascular disease and mortality in the UK Biobank cohort study

**AUTHORS:** Katherine M. Livingstone<sup>1\*</sup>, Gavin Abbott<sup>1</sup>, Joey Ward<sup>2</sup>, Steven J. Bowe<sup>3</sup>

**AFFILIATIONS**

1, Deakin University, Institute for Physical Activity and Nutrition Research, School of Exercise and Nutrition Sciences, Geelong, VIC 3220, Australia, k.livingstone@deakin.edu.au, gavin.abbott@deakin.edu.au

2, Institute of Health and Wellbeing, University of Glasgow, Glasgow, UK, Joey.Ward@glasgow.ac.uk

3, Deakin Biostatistics Unit, Deakin University, Geelong, VIC 3220, Australia, s.bowe@deakin.edu.au

**CORRESPONDING AUTHOR:** Dr Katherine Mary Livingstone, Deakin University, Institute for Physical Activity and Nutrition, School of Exercise and Nutrition Sciences, Melbourne, Melbourne Burwood Campus, 221 Burwood Highway, Victoria 3125, Australia, Tel: +61 3 92445416 Email: k.livingstone@deakin.edu.au

**Table S1.** STROBE Statement—Checklist of items that should be included in reports of *cohort studies*

|                              | Item No | Recommendation                                                                                                                                                                                                                                                                                                         | Page |
|------------------------------|---------|------------------------------------------------------------------------------------------------------------------------------------------------------------------------------------------------------------------------------------------------------------------------------------------------------------------------|------|
| <b>Title and abstract</b>    | 1       | (a) Indicate the study's design with a commonly used term in the title or the abstract<br>(b) Provide in the abstract an informative and balanced summary of what was done and what was found                                                                                                                          | 1    |
| <b>Introduction</b>          |         |                                                                                                                                                                                                                                                                                                                        |      |
| Background/rationale         | 2       | Explain the scientific background and rationale for the investigation being reported                                                                                                                                                                                                                                   | 2    |
| Objectives                   | 3       | State specific objectives, including any prespecified hypotheses                                                                                                                                                                                                                                                       | 3    |
| <b>Methods</b>               |         |                                                                                                                                                                                                                                                                                                                        |      |
| Study design                 | 4       | Present key elements of study design early in the paper                                                                                                                                                                                                                                                                | 3-4  |
| Setting                      | 5       | Describe the setting, locations, and relevant dates, including periods of recruitment, exposure, follow-up, and data collection                                                                                                                                                                                        | 3-4  |
| Participants                 | 6       | (a) Give the eligibility criteria, and the sources and methods of selection of participants. Describe methods of follow-up<br>(b) For matched studies, give matching criteria and number of exposed and unexposed                                                                                                      | 3-4  |
| Variables                    | 7       | Clearly define all outcomes, exposures, predictors, potential confounders, and effect modifiers. Give diagnostic criteria, if applicable                                                                                                                                                                               | 4-9  |
| Data sources/<br>measurement | 8*      | For each variable of interest, give sources of data and details of methods of assessment (measurement). Describe comparability of assessment methods if there is more than one group                                                                                                                                   | 4-9  |
| Bias                         | 9       | Describe any efforts to address potential sources of bias                                                                                                                                                                                                                                                              | 9    |
| Study size                   | 10      | Explain how the study size was arrived at                                                                                                                                                                                                                                                                              | 10   |
| Quantitative variables       | 11      | Explain how quantitative variables were handled in the analyses. If applicable, describe which groupings were chosen and why                                                                                                                                                                                           | 9-10 |
| Statistical methods          | 12      | (a) Describe all statistical methods, including those used to control for confounding<br>(b) Describe any methods used to examine subgroups and interactions<br>(c) Explain how missing data were addressed<br>(d) If applicable, explain how loss to follow-up was addressed<br>(e) Describe any sensitivity analyses | 9-10 |
| <b>Results</b>               |         |                                                                                                                                                                                                                                                                                                                        |      |
| Participants                 | 13*     | (a) Report numbers of individuals at each stage of study—eg numbers potentially eligible, examined for eligibility, confirmed eligible, included in the study, completing follow-up, and analysed                                                                                                                      | 10   |

|                          |     |                                                                                                                                                                                                                                                                                                                                                                                                               |       |
|--------------------------|-----|---------------------------------------------------------------------------------------------------------------------------------------------------------------------------------------------------------------------------------------------------------------------------------------------------------------------------------------------------------------------------------------------------------------|-------|
|                          |     | (b) Give reasons for non-participation at each stage<br>(c) Consider use of a flow diagram                                                                                                                                                                                                                                                                                                                    |       |
| Descriptive data         | 14* | (a) Give characteristics of study participants (eg demographic, clinical, social) and information on exposures and potential confounders<br>(b) Indicate number of participants with missing data for each variable of interest<br>(c) Summarise follow-up time (eg, average and total amount)                                                                                                                | 10-11 |
| Outcome data             | 15* | Report numbers of outcome events or summary measures over time                                                                                                                                                                                                                                                                                                                                                | 11-13 |
| Main results             | 16  | (a) Give unadjusted estimates and, if applicable, confounder-adjusted estimates and their precision (eg, 95% confidence interval). Make clear which confounders were adjusted for and why they were included<br>(b) Report category boundaries when continuous variables were categorized<br>(c) If relevant, consider translating estimates of relative risk into absolute risk for a meaningful time period | 11-13 |
| Other analyses           | 17  | Report other analyses done—eg analyses of subgroups and interactions, and sensitivity analyses                                                                                                                                                                                                                                                                                                                | 11-13 |
| <b>Discussion</b>        |     |                                                                                                                                                                                                                                                                                                                                                                                                               |       |
| Key results              | 18  | Summarise key results with reference to study objectives                                                                                                                                                                                                                                                                                                                                                      | 13    |
| Limitations              | 19  | Discuss limitations of the study, taking into account sources of potential bias or imprecision. Discuss both direction and magnitude of any potential bias                                                                                                                                                                                                                                                    | 14-15 |
| Interpretation           | 20  | Give a cautious overall interpretation of results considering objectives, limitations, multiplicity of analyses, results from similar studies, and other relevant evidence                                                                                                                                                                                                                                    | 14-15 |
| Generalisability         | 21  | Discuss the generalisability (external validity) of the study results                                                                                                                                                                                                                                                                                                                                         | 14-16 |
| <b>Other information</b> |     |                                                                                                                                                                                                                                                                                                                                                                                                               |       |
| Funding                  | 22  | Give the source of funding and the role of the funders for the present study and, if applicable, for the original study on which the present article is based                                                                                                                                                                                                                                                 | 16    |

---

\*Give information separately for exposed and unexposed groups.

**Table S2.** Components and scoring methods of the Healthy Diet Indicator (HDI)

| Dietary Indicator                  | Indicator foods <sup>1</sup>                                                                                                                                                                                                                                                                                                                                                                                                                                                                                                                                                        | Criteria for scoring                                   |
|------------------------------------|-------------------------------------------------------------------------------------------------------------------------------------------------------------------------------------------------------------------------------------------------------------------------------------------------------------------------------------------------------------------------------------------------------------------------------------------------------------------------------------------------------------------------------------------------------------------------------------|--------------------------------------------------------|
| 1. Saturated fatty acids           | Saturated fat                                                                                                                                                                                                                                                                                                                                                                                                                                                                                                                                                                       | >10% energy intake=0<br>0-10% energy intake=1          |
| 2. Polyunsaturated fatty acids     | Polyunsaturated fat                                                                                                                                                                                                                                                                                                                                                                                                                                                                                                                                                                 | <6 or >10% energy intake=0<br>6-10% energy intake=1    |
| 3. Protein                         | Protein                                                                                                                                                                                                                                                                                                                                                                                                                                                                                                                                                                             | <10 or >15% energy intake=0<br>10-15% energy intake=1  |
| 4. Total carbohydrates             | Carbohydrates                                                                                                                                                                                                                                                                                                                                                                                                                                                                                                                                                                       | <50% or >70% energy intake=0<br>50-70% energy intake=1 |
| 5. Dietary fibre                   | Englyst dietary fibre                                                                                                                                                                                                                                                                                                                                                                                                                                                                                                                                                               | <18 or >32 g/day=0<br>18-32 g/day =1                   |
| 6. Fruits and vegetables           | Mixed vegetable, vegetable pieces, avocado, beetroot, broccoli, butternut squash, cabbage/kale, carrot, cauliflower, celery, courgette, cucumber, garlic, leek, lettuce, mushroom, onion, olives, parsnip, pea, side salad, sweet pepper, spinach, sprouts, sweetcorn, fresh tomato, tinned tomato, green bean, turnip/swede, watercress, other vegetables, homemade soup (vegetables)<br>Stewed fruit, prune, dried fruit, mixed fruit, apple, banana, berry, cherry, grapefruit, grape, mango, melon, orange, satsuma, peach/nectarine intake, pear, pineapple, plum, other fruit | <400 g/day=0<br>≥400 g/day=1                           |
| 7. Pulses and nuts                 | Baked bean, pulses, broad bean<br>Salted peanuts, unsalted peanuts, salted nuts, unsalted nuts, seeds, types of spreads/sauces consumed (peanut butter)                                                                                                                                                                                                                                                                                                                                                                                                                             | <30 g/day=0<br>≥30 g/day=1                             |
| 8. Total non-milk extrinsic sugars | Total sugars                                                                                                                                                                                                                                                                                                                                                                                                                                                                                                                                                                        | >10 % energy intake=0<br>0-10 % energy intake=1        |
| 9. Fish                            | Tinned tuna, oily fish, white fish, prawns, lobster/crab, shellfish, other fish<br>Homemade soup, ingredients in homemade soup (fish)                                                                                                                                                                                                                                                                                                                                                                                                                                               | <32 g/day=0<br>≥32 g/day=1                             |
| 10. Red meat and meat products     | Beef, pork, lamb, other meat<br>Poultry intake (skin removed from poultry (no); fat removed from poultry(no))<br>Homemade soup, ingredients in homemade soup (meat)                                                                                                                                                                                                                                                                                                                                                                                                                 | >90 g/day=0<br>≤90 g/day=1                             |
| 11. Calcium                        | Sausage, bacon, ham, liver<br>Calcium                                                                                                                                                                                                                                                                                                                                                                                                                                                                                                                                               | <700 mg/day=0<br>≥700 mg/day=1                         |

1. As available in the UK Biobank

**Table S3.** Comparison of participant characteristics between the excluded and analytic sample

| <b>Characteristic</b>                               | <b>Excluded<br/>N (%)</b> | <b>Analytic<br/>N (%)</b> |
|-----------------------------------------------------|---------------------------|---------------------------|
| N <sup>1</sup>                                      | 425,578                   | 76,958                    |
| Sex, female                                         | 231,412 (54.4)            | 41,990 (54.6)             |
| Age at recruitment (years), Mean $\pm$ SD           | 56.6 $\pm$ 8.2            | 56.2 $\pm$ 7.8            |
| Townsend Deprivation Index                          |                           |                           |
| Least deprived                                      | 82,549 (19.4)             | 18,115 (23.5)             |
| 2nd least deprived                                  | 82,883 (19.5)             | 17,222 (22.4)             |
| Medium deprivation                                  | 84,328 (19.8)             | 16,062 (20.9)             |
| 2nd most deprived                                   | 85,484 (20.1)             | 14,891 (19.4)             |
| Most deprived                                       | 89,711 (21.1)             | 10,668 (13.9)             |
| Body Mass Index (kg/m <sup>2</sup> ), Mean $\pm$ SD | 27.6 $\pm$ 4.9            | 26.5 $\pm$ 4.4            |
| Favourable lifestyle behaviours <sup>2</sup>        |                           |                           |
| Non-smoker                                          | 374,612 (88.6)            | 71,995 (93.6)             |
| No overweight/obesity                               | 127,382 (29.9)            | 30,239 (39.3)             |
| Physically active                                   | 206,533 (48.5)            | 23,131 (30.1)             |
| Not sedentary                                       | 400,731 (94.2)            | 73,310 (95.3)             |
| Optimal sleep                                       | 305,273 (72.3)            | 60,545 (78.7)             |

Townsend Deprivation Index is a composite measure of deprivation based on unemployment, non-car ownership, non-home ownership, and household overcrowding.

1, In the excluded sample, data on Townsend Deprivation Index, smoking and sleep were available in n=424,909, n= 422,628 and n=422,249, respectively.

2, Data for Healthy Diet Indicator are not presented as the variable was derived based on 2 or more OxfordWebQs, which were not available in the excluded sample.

**Table S4.** Cox-proportional hazard ratios and 95% CI for risk of all-cause mortality, CVD mortality and CVD events according to a healthy lifestyle score (continuous) in participants from the UK Biobank

|                          | Overall (n=76,958) |      |            |         | Males (n=34,968) |      |            |         | Females (n=41,990) |      |            |         |
|--------------------------|--------------------|------|------------|---------|------------------|------|------------|---------|--------------------|------|------------|---------|
|                          | Cases              | HR   | 95% CI     | P-value | Cases            | HR   | 95% CI     | P-value | Cases              | HR   | 95% CI     | P-value |
| All-cause mortality      | 2,408              | 1.37 | 1.28, 1.46 | <0.001  | 1,415            | 1.40 | 1.28, 1.53 | <0.001  | 993                | 1.32 | 1.18, 1.47 | <0.001  |
| CVD mortality            | 364                | 1.45 | 1.22, 1.73 | <0.001  | 263              | 1.50 | 1.22, 1.83 | <0.001  | 101                | 1.32 | 0.94, 1.86 | 0.11    |
| Myocardial<br>Infarction | 1,140              | 1.39 | 1.26, 1.54 | <0.001  | 822              | 1.36 | 1.21, 1.52 | <0.001  | 318                | 1.49 | 1.23, 1.79 | <0.001  |
| Stroke                   | 748                | 1.22 | 1.08, 1.38 | 0.002   | 447              | 1.08 | 0.91, 1.26 | 0.14    | 301                | 1.47 | 1.21, 1.78 | 0.019   |

CVD, cardiovascular disease; Healthy Lifestyle Score was based on not smoking, no overweight/obesity, above median diet quality, meeting physical activity guidelines of 150 min/day, sleep duration between 7-9 hours and sedentary time  $\leq$  7 hours/day. Models were adjusted for age (time scale), sex (when not used to stratify) and deprivation (categorical).

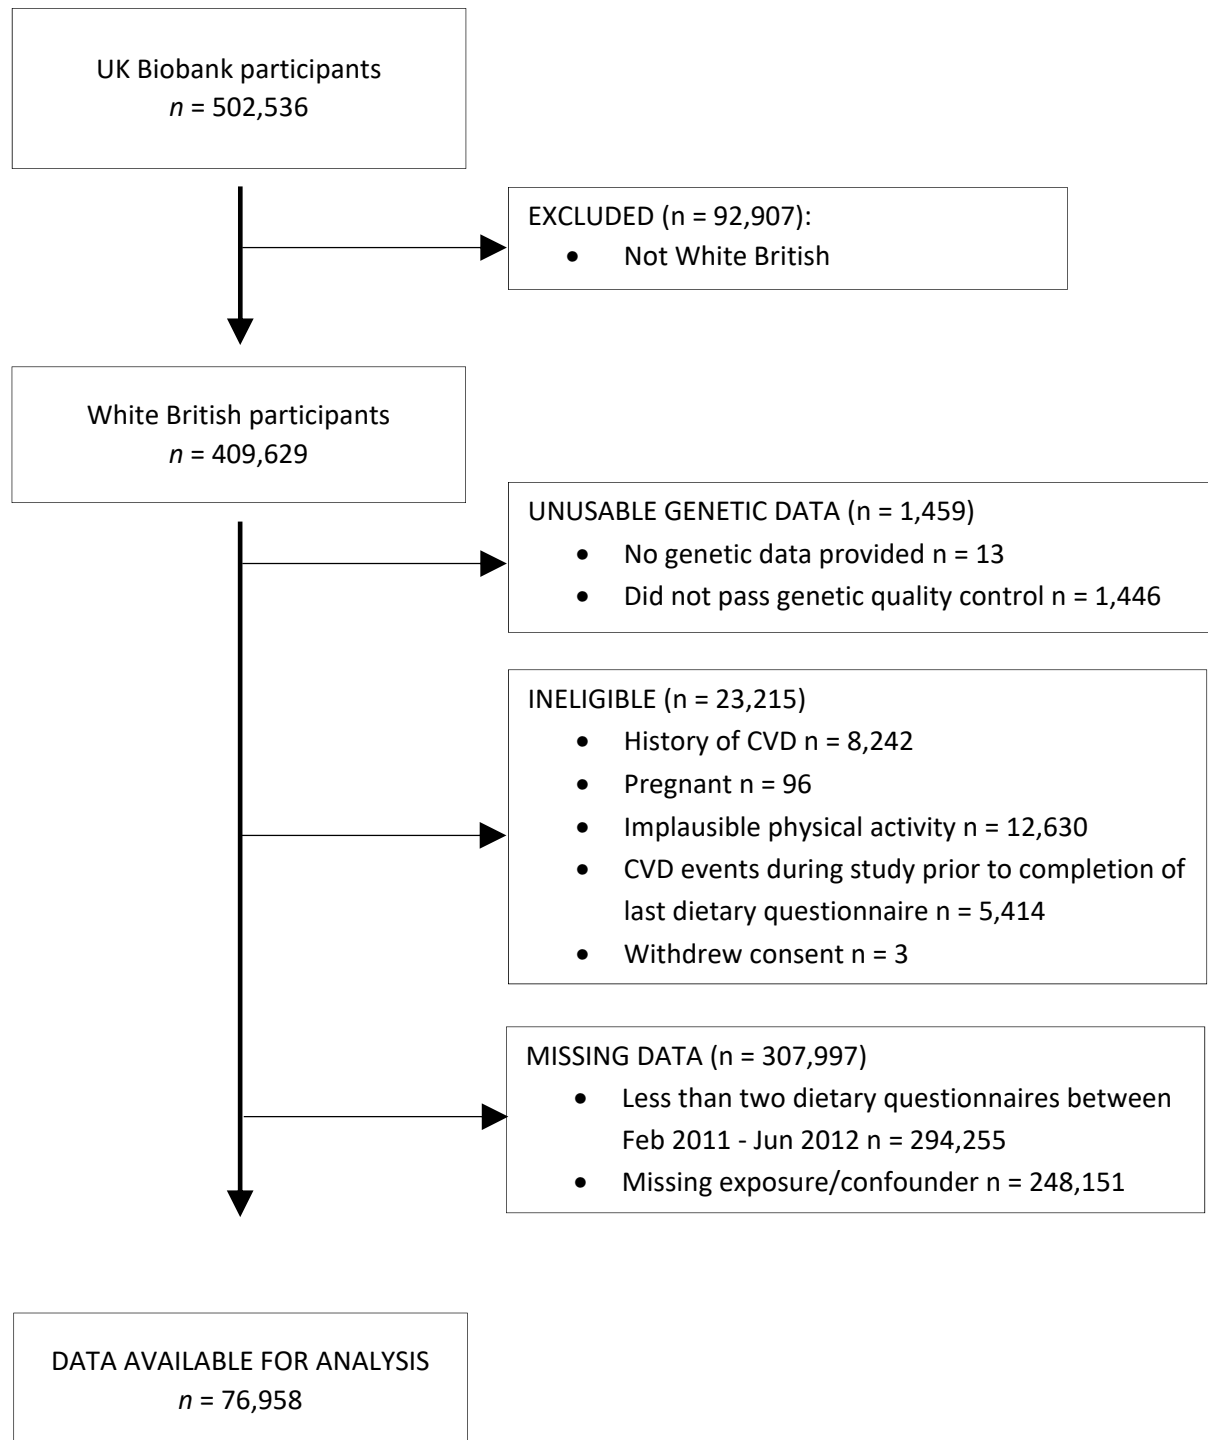

**Figure S1.** Flow diagram of participants in the UK Biobank
